# Supplementary material
Source: publisher figshare collection journal article supplement (https://acs.figshare.com/ndownloader/files/27796339)
Supplement: Supplementary file 1 [file 27796339]

# Supporting Information

## Highly efficient solution processed organic light emitting diodes containing a new crosslinkable hole transport material blended with commercial hole transport materials

Hyein Ha,<sup>†</sup> Young Jae Shim,<sup>†</sup> Da Hwan Lee,<sup>†</sup> Eun Young Park,<sup>†</sup> In-Ho Lee,<sup>‡</sup> Seok-Keun Yoon<sup>‡</sup> and Min Chul Suh<sup>\*,†</sup>

<sup>†</sup> Organic Electronic Materials Laboratory, Department of Information Display, Kyung Hee University, Seoul 02447, Korea

<sup>‡</sup> P&H Tech Co., Ltd., Daewoo Frontier Valley, 16-25 Giheung-Gu, Yongin-Si, Gyeonggi-Do, Korea 17015

\*Corresponding author: [mcsuh@khu.ac.kr](mailto:mcsuh@khu.ac.kr)

### ORCID

Min Chul Suh: 0000-0002-1295-1693

### Present Addresses

Department of Information Display, Kyung Hee University, Seoul 02447, Republic of Korea

(a)

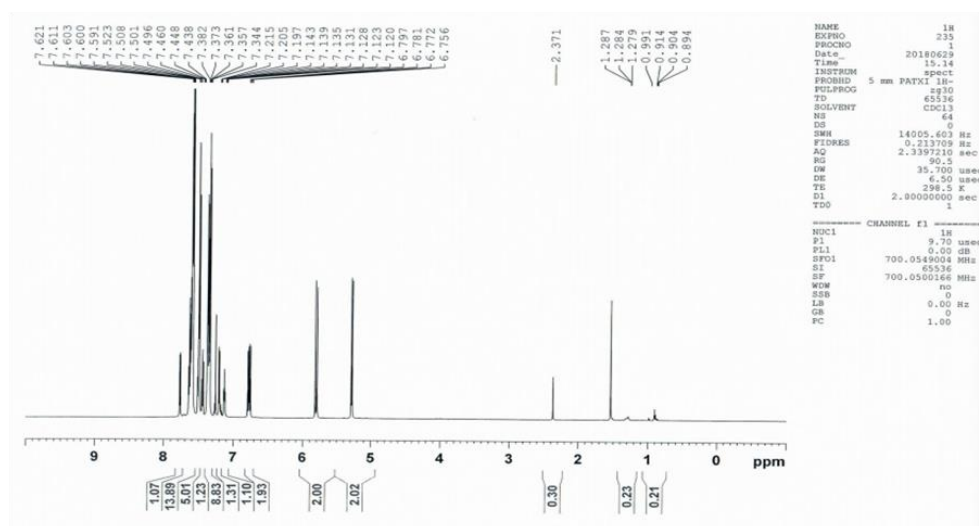

(b)

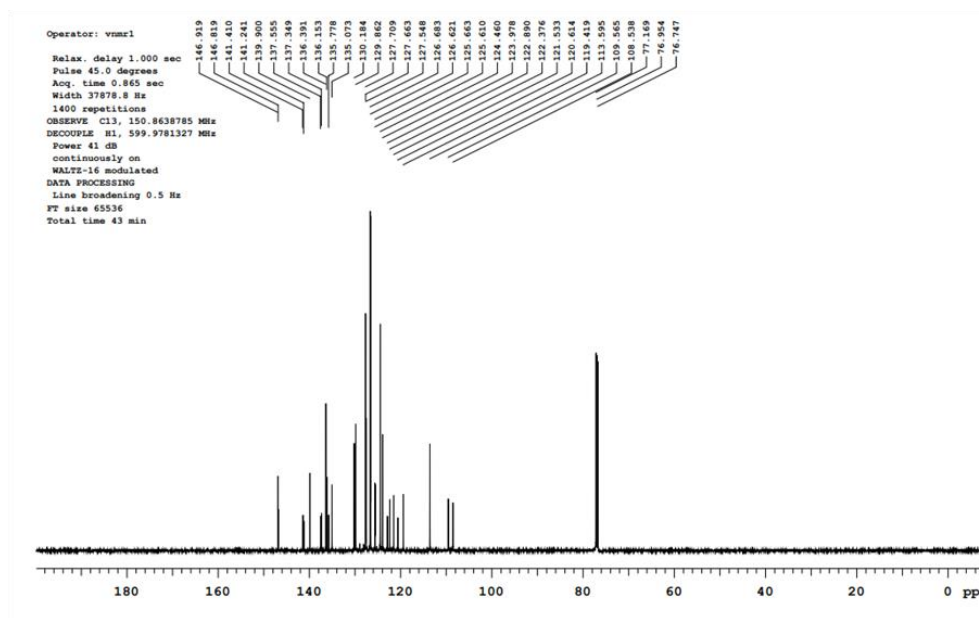

Figure S1. (a) <sup>1</sup>H NMR and (b) <sup>13</sup>C NMR of PbV

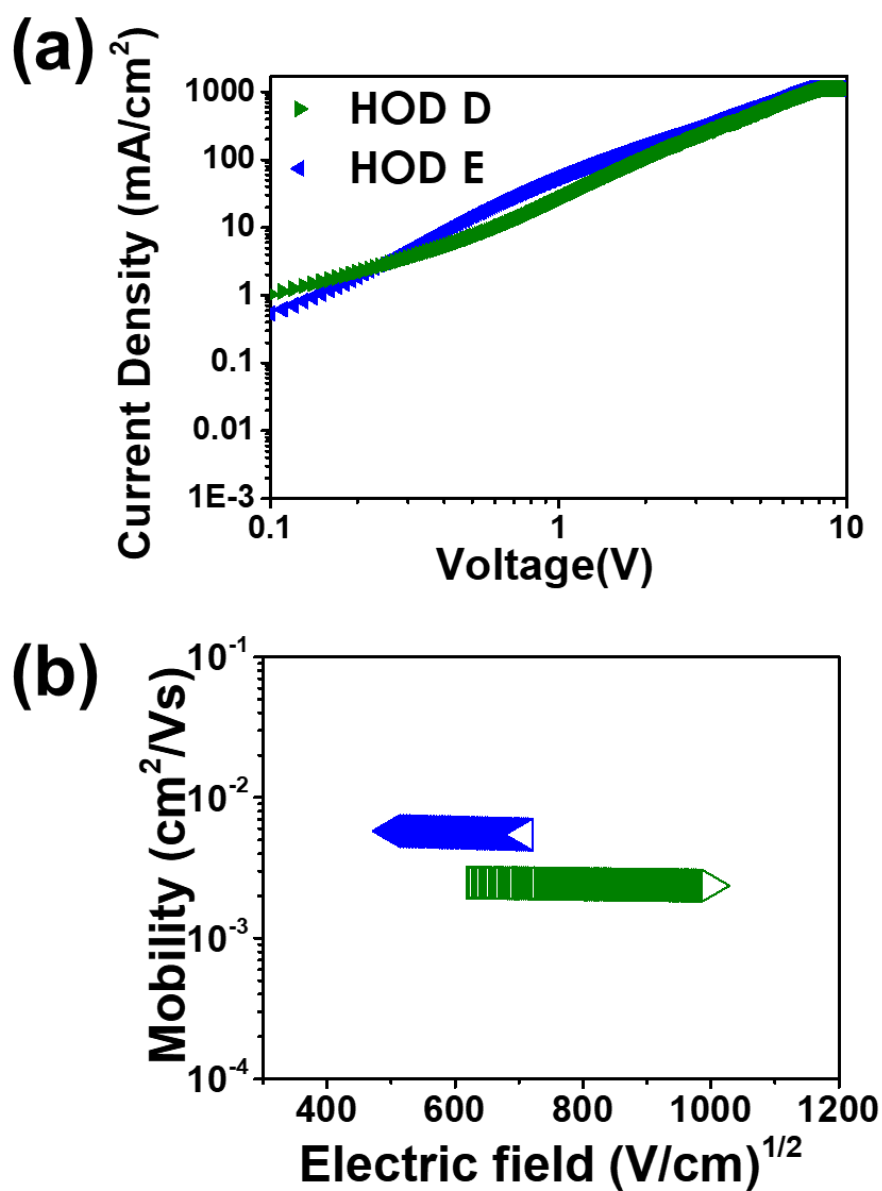

**Figure S2.** (a) Hole only devices and J-V characteristic (b) hole mobility for two types of HTL extracted from the SCLC region. (HOD D: poly-TPD, HOD E: TFB)

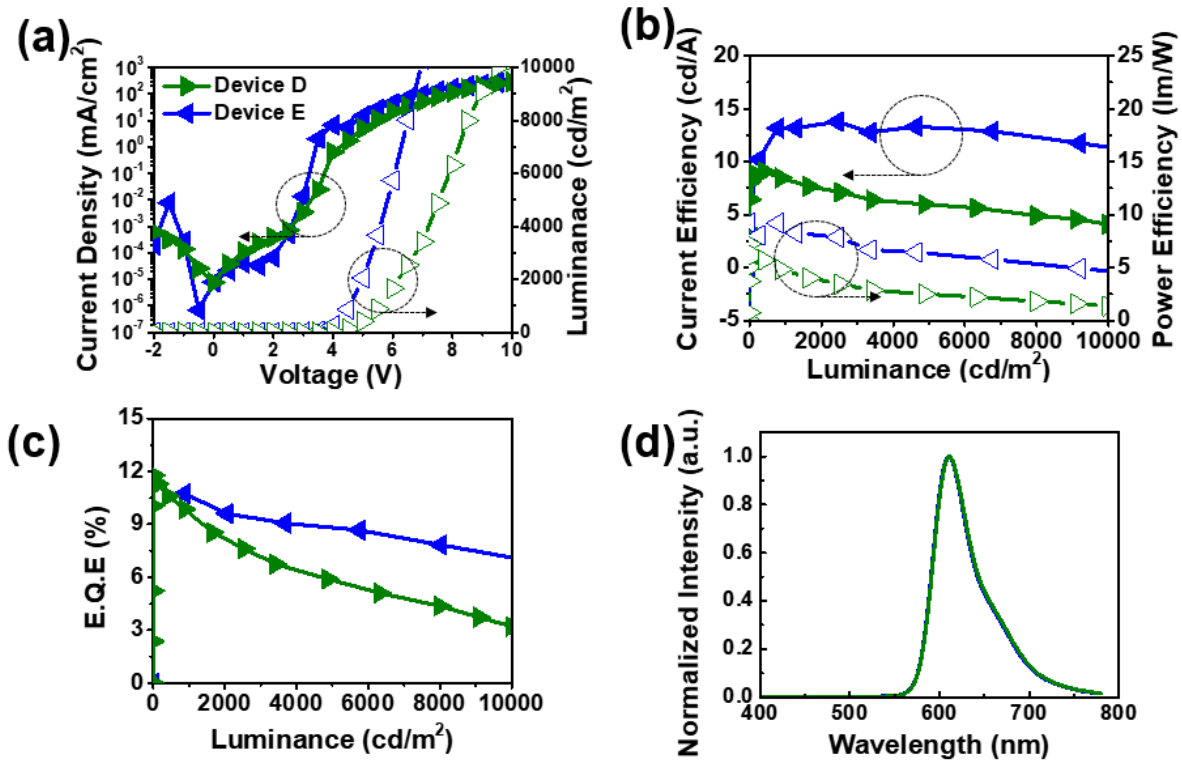

**Figure S3.** (a)  $J$ - $V$ - $L$  curves, (b) current and power efficiency curves according to the variation of  $L$ , (c) EQE -  $L$ , and (d) EL spectra of red devices measured at 1000 nits.

**Table S1.** Summary of device characteristics of the red PHOLED.

| Device   | $V_{on}^a / V_{op}^b$ | CE <sup>c</sup> /PE <sup>d</sup> /EQE <sup>e</sup> |                        | CIE (x,y)   |
|----------|-----------------------|----------------------------------------------------|------------------------|-------------|
|          |                       | Maximum                                            | 1000 cd/m <sup>2</sup> |             |
| Device D | 2.5 / 5.5             | 9.1 / 7.2 / 11.8                                   | 8.5 / 4.8 / 9.9        | (0.65,0.35) |
| Device E | 2.5 / 4.5             | 13.8 / 9.2 / 10.7                                  | 13.2 / 9.2 / 10.7      | (0.65,0.35) |

<sup>a</sup>  $V_{on}$  [V]: voltage at 1 cd/m<sup>2</sup> <sup>b</sup>  $V_{op}$  [V]: voltage at 1000 cd/m<sup>2</sup> <sup>c</sup> CE [cdA<sup>-1</sup>]: a current efficiency. <sup>d</sup> PE [lmW<sup>-1</sup>]: a power efficiency. <sup>e</sup> EQE [%]: an external quantum efficiency estimated from the assumption of Lambertian distribution.

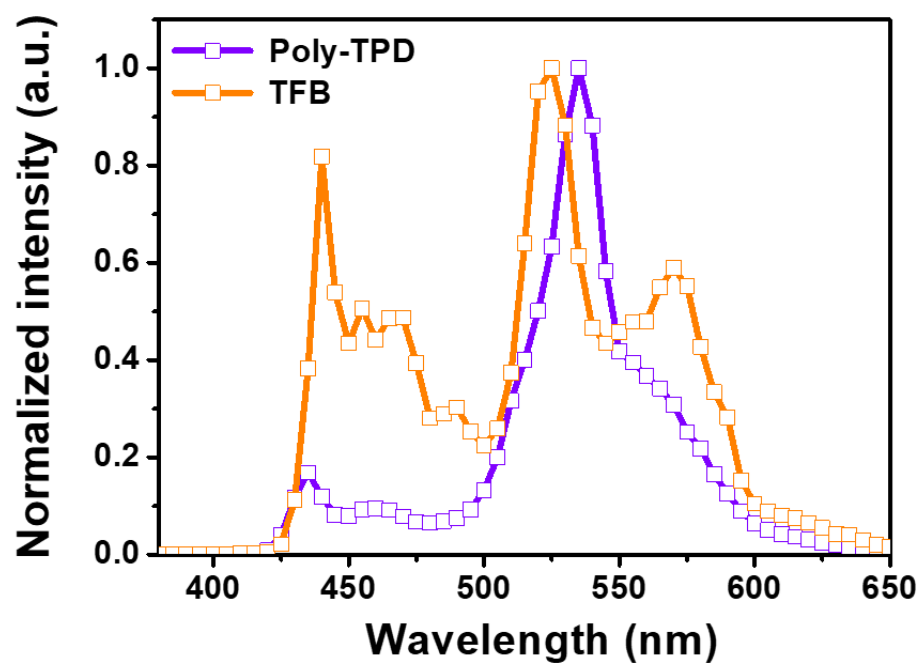

**Figure S4.** Low temperature photoluminescent spectra of dilute solutions of poly-TPD and TFB

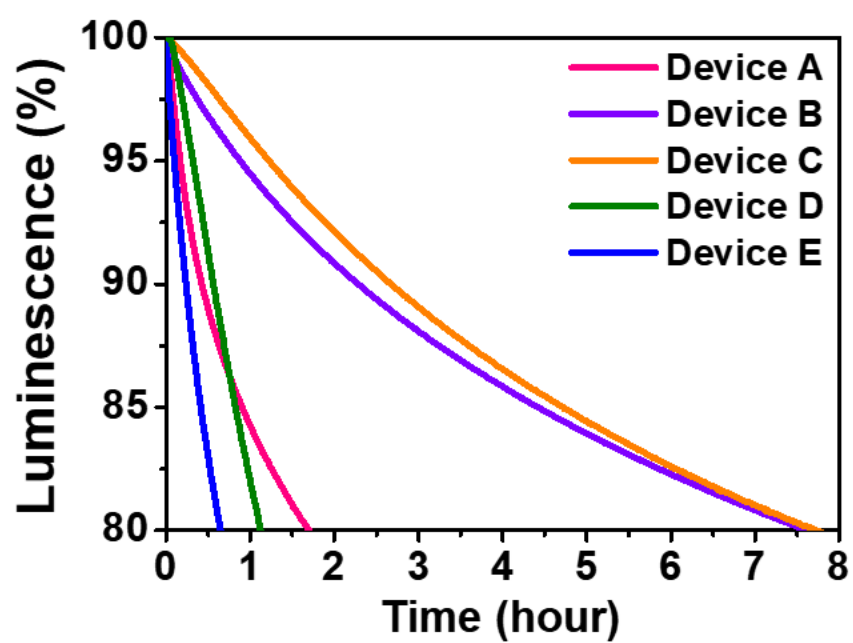

**Figure S5.** The result of lifetime measurement for red OLEDs started from 1000 cd/m<sup>2</sup>
